# Supplementary material for: Association of Clinical Frailty Scores With Hospital Readmission for Falls After Index Admission for Trauma-Related Injury
Source: PubMed Central journal article supplement (PMC6777261; doi:10.1001/jamanetworkopen.2019.12409), 2019-10-02
Supplement: jamanetwopen-2-e1912409-s001.pdf [file jamanetwopen-2-e1912409-s001.pdf]

## Supplementary Online Content

Hatcher VH, Galet C, Lilienthal M, Skeete DA, Romanowski KS. Association of clinical frailty scores with hospital readmission for falls after index admission for trauma-related injury. *JAMA Netw Open*. 2019;2(10):e1912409. doi:10.1001/jamanetworkopen.2019.12409

**eTable.** Canadian Study of Health and Aging Clinical Frailty Scale

This supplementary material has been provided by the authors to give readers additional information about their work.

**eTable. Canadian Study of Health and Aging Clinical Frailty Scale**

| <b>Frailty definition</b> | <b>CSHA CFS score</b> | <b>Clinical definition</b>                                                                                                                                                           |
|---------------------------|-----------------------|--------------------------------------------------------------------------------------------------------------------------------------------------------------------------------------|
| <b>Non Frail</b>          | <b>1</b>              | The patient is extremely active (and this is noted in the history) and presented with no known comorbidity.                                                                          |
|                           | <b>2</b>              | The patient presented with no known comorbidity                                                                                                                                      |
|                           | <b>3</b>              | The patient presented either with one or more known comorbidity, all controlled by medication                                                                                        |
|                           | <b>4</b>              | The patient presented with at least one known comorbidity controlled by multiple medications, two to four comorbidities not controlled by medication, or five or more comorbidities. |
| <b>Frail</b>              | <b>5</b>              | The patient required assistive devices to ambulate or required oxygen supplementation.                                                                                               |
|                           | <b>6</b>              | The patient required outside help to perform daily activities.                                                                                                                       |
|                           | <b>7</b>              | The patient presented with a known terminal illness and outside help to perform daily activities.                                                                                    |
